# Supplementary material for: Monitoring landcover change and desertification processes in northern China and Mongolia using historical written sources and vegetation indices
Source: Copernicus journal article supplement (doi:10.5194/cp-2021-5), 2021-02-09

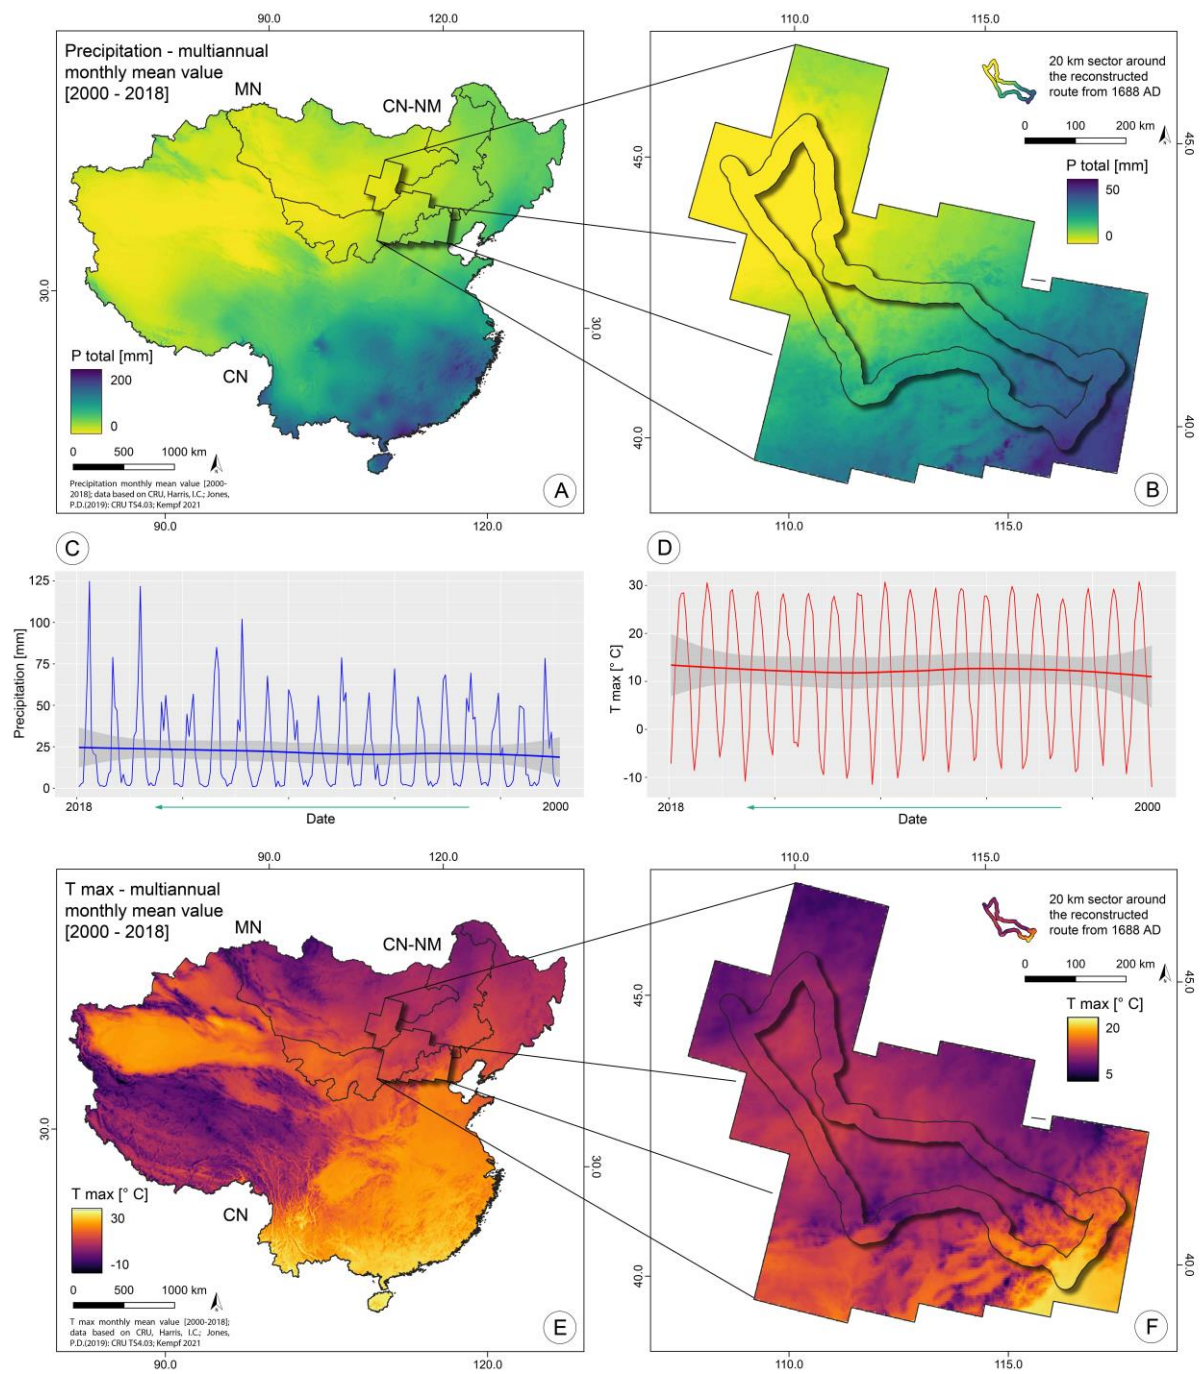

Supplement: Supplementary file [file new_Fig_2.pdf › new_Fig_2.pdf]
